# Supplementary material
Source: PubMed Central journal article supplement (PMC9061771)

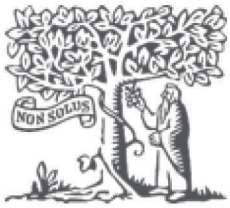

ELSEVIER

# Certificate of Elsevier Language Editing Services

The following article was edited by Elsevier Language Editing Services:  
"FXR: structures, biology, and drug development for NASH and fibrosis diseases"

Authored by:

Si-Yu TIAN, Shu-Ming CHEN, Cheng-Xi PAN, Yong LI

Date: 30-Nov-2021

Serial number: LE-226854-180CB00A09CE

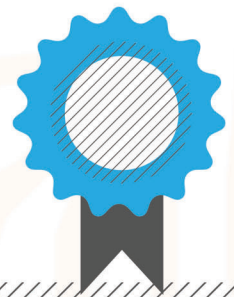

Supplement: 41401_2021_849_MOESM1_ESM.pdf [file 41401_2021_849_MOESM1_ESM.pdf]
